# Supplementary material
Source: publisher figshare collection journal article supplement (https://acs.figshare.com/ndownloader/files/26211967)
Supplement: Supplementary file 1 [file 26211967]

## Supporting Information:

### Role of Intermolecular Charge Fluxes in the Hydrogen-Bond-Induced Frequency Shifts of the OH Stretching Mode of Water

Hajime Torii<sup>1,2\*</sup> and Ryota Ukawa<sup>1</sup>

<sup>1</sup> Department of Applied Chemistry and Biochemical Engineering, Faculty of Engineering, Shizuoka University, 3-5-1 Johoku, Naka-ku, Hamamatsu 432-8561, Japan.

<sup>2</sup> Department of Optoelectronics and Nanostructure Science, Graduate School of Science and Technology, Shizuoka University, 3-5-1 Johoku, Naka-ku, Hamamatsu 432-8561, Japan.

#### Supplementary figure

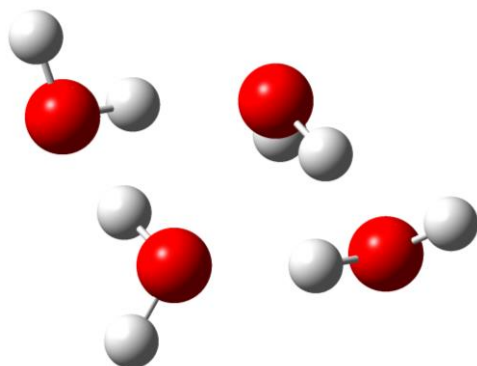

**Figure S1.** Structure of the water cyclic tetramer with the  $S_4$  symmetry.

## Supplementary table

**Table S1.** Coefficients of the polynomials of the fitting to some of the correlations among the structural, vibrational, and electrostatic properties

| $x$                                        | $y$                                                         | species      | equation                                                           |
|--------------------------------------------|-------------------------------------------------------------|--------------|--------------------------------------------------------------------|
| field on H / $10^{-2} E_h e^{-1} a_0^{-1}$ | dipole derivative / $D \text{ \AA}^{-1} \text{ amu}^{-1/2}$ | all          | $y = 0.8355 x + 0.6313$                                            |
|                                            |                                                             | non-H-bonded | $y = 0.2683 x + 1.0753$                                            |
| field on H / $10^{-2} E_h e^{-1} a_0^{-1}$ | frequency (scaled) / $\text{cm}^{-1}$                       | all          | $y = -20.362 x^2 - 8.534 x + 3715.03$                              |
| hydrogen-bond distance / $\text{ \AA}$     | dipole derivative / $D \text{ \AA}^{-1} \text{ amu}^{-1/2}$ | H-bonded     | $y = 4.6991 (x - 2)^2 - 5.2002 (x - 2) + 2.9443$                   |
| hydrogen-bond distance / $\text{ \AA}$     | frequency (scaled) / $\text{cm}^{-1}$                       | H-bonded     | $y = 2612.1 (x - 2)^3 - 1563.7 (x - 2)^2 + 568.7 (x - 2) + 3520.3$ |
